# Supplementary material for: Prevalence of Herbal Medicine Utilization and Associated Factors Among Pregnant Women in Gazo District, North Wollo, Ethiopia, 2025.
Source: Research Square preprint supplement (doi:10.21203/rs.3.rs-8692152/v1), 2026-01-27
Supplement: Supplementary file 1 [file f44887c8dd852ae402f9caea.pdf]

## Supplementary Materials

### Annex I

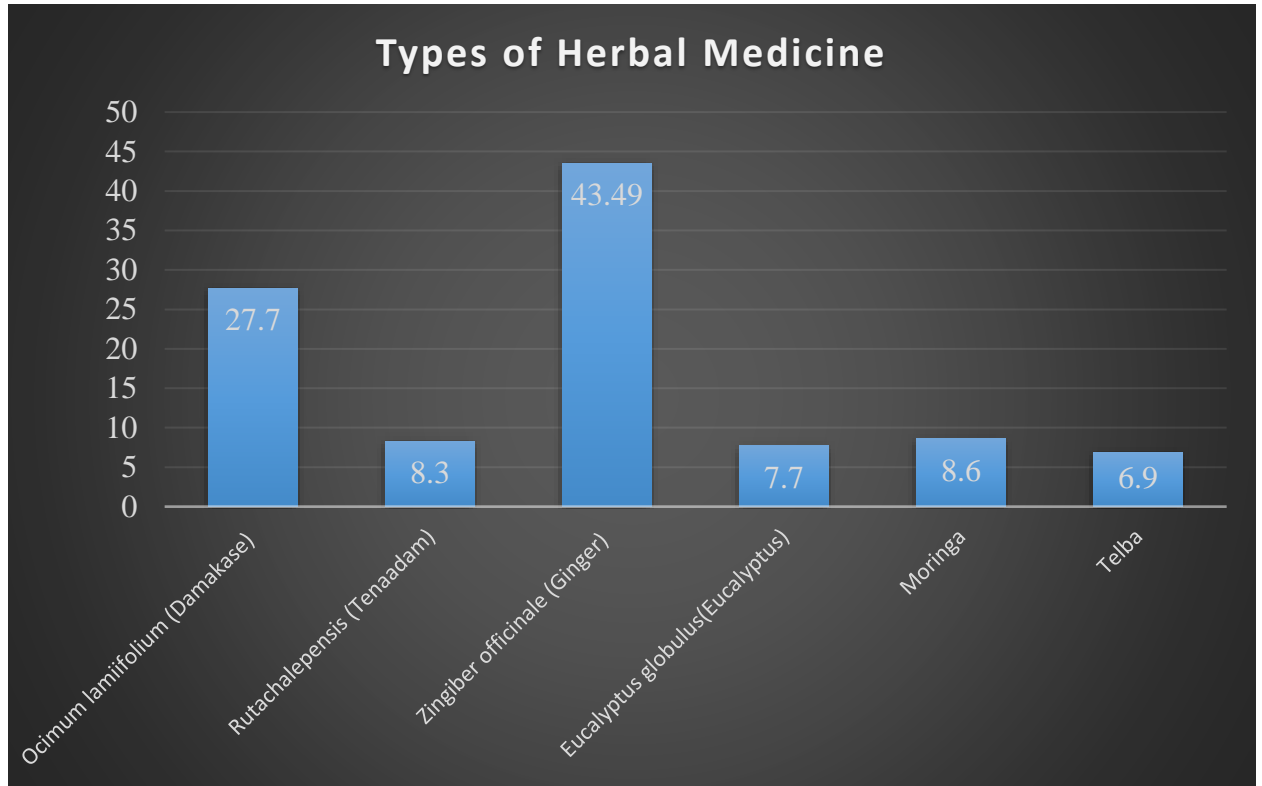

Figure 2 shows the types of herbal medicine utilization of pregnant women in Gazo District, North Wollo, Ethiopia, 2025. (N=456).

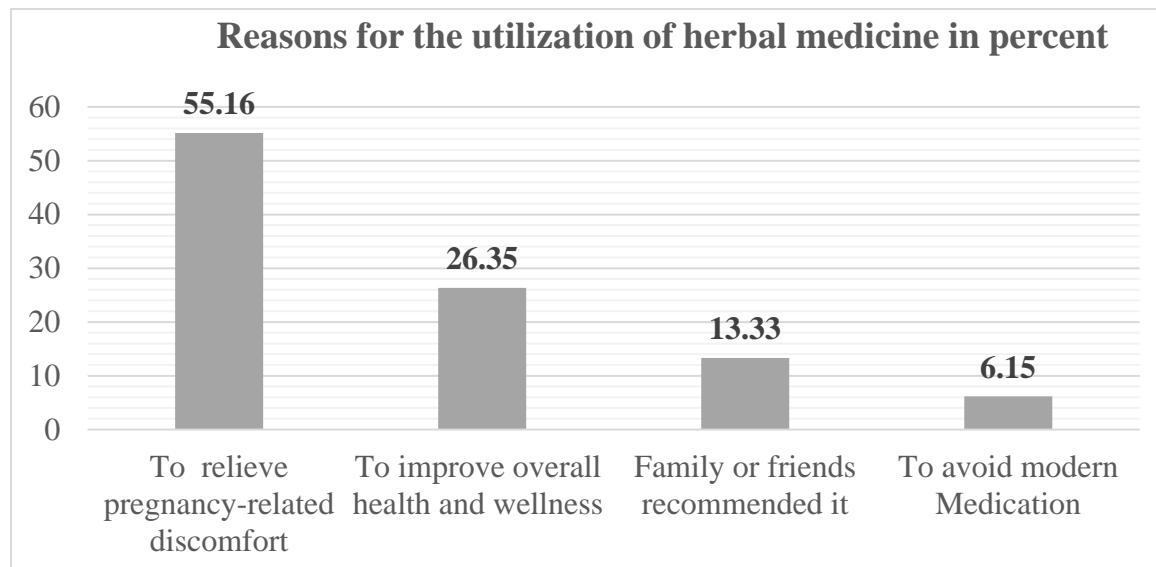

Figure 3: shows the types of herbal medicine utilization of pregnant women in Gazo District, North Wollo, Ethiopia, 2025. (N=456).

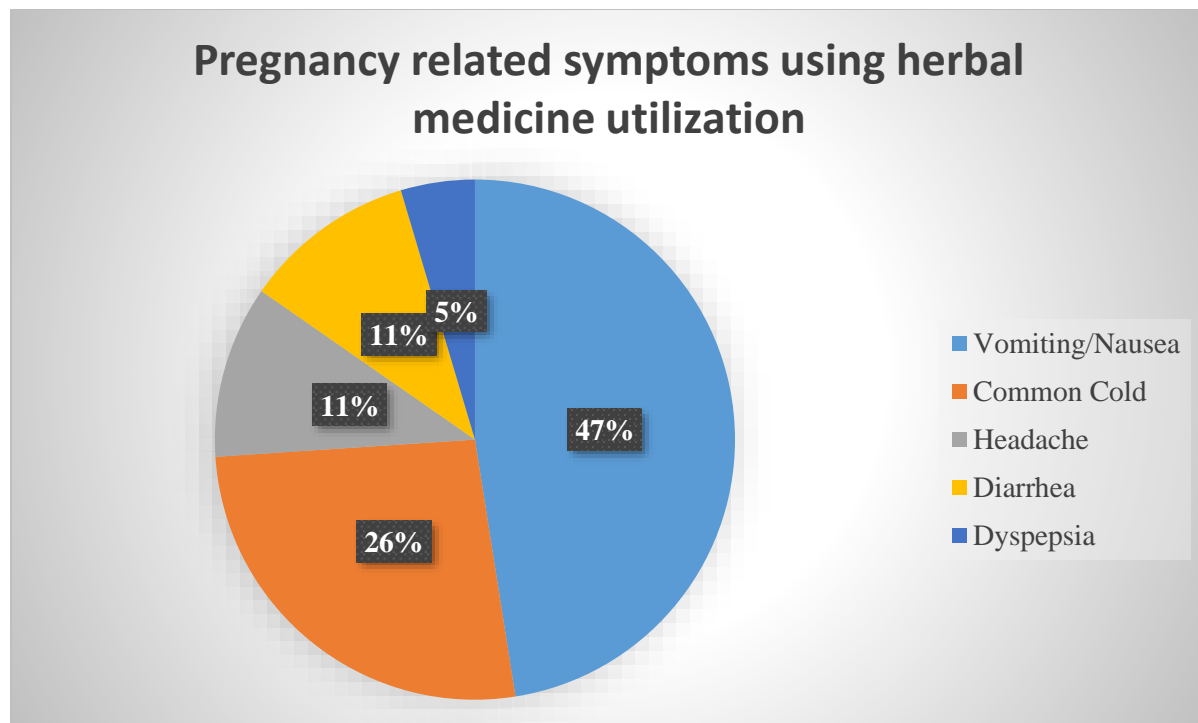

Figure 4: shows the pregnancy-related symptoms using herbal medicine utilization of pregnant women in Gazo District, North Wollo, Ethiopia, 2025.

Table 4: Socio-cultural factors of pregnant Women in Gazo District, North Wollo, Ethiopia, 2025.  
(N=456).

| <b>Variables</b>                                                                            | <b>Categories</b>                     | <b>Frequency</b> | <b>Percent %</b> |
|---------------------------------------------------------------------------------------------|---------------------------------------|------------------|------------------|
| <b>Have you been encouraged by cultural practices to use herbal medicine</b>                | Yes                                   | 309              | 67.76            |
|                                                                                             | No                                    | 147              | 32.24            |
| <b>Did you pay for the herbal medicines you used</b>                                        | Yes                                   | 198              | 43.42            |
|                                                                                             | No                                    | 258              | 56.58            |
| <b>Who recommended the Herbal medicine for you</b>                                          | Traditional Medicine                  | 126              | 17.63            |
|                                                                                             | Family Member                         | 226              | 49.56            |
|                                                                                             | Friend/neighbor                       | 71               | 15.57            |
|                                                                                             | Self (Personal experience)            | 33               | 7.24             |
| <b>Do you think herbal Medicine is more accessible and affordable than Modern medicine?</b> | Yes                                   | 229              | 50.22            |
|                                                                                             | No                                    | 227              | 49.78            |
| <b>Do you think herbal Medicine is more effective and safer than modern medicine</b>        | Yes                                   | 126              | 27.63            |
|                                                                                             | No                                    | 330              | 72.37            |
| <b>What factors influenced your decision to use herbal medicine over modern Medicine</b>    | Lack of access to healthcare services | 207              | 45.39            |
|                                                                                             | Cost of modern medicine               | 74               | 16.23            |
|                                                                                             | Cultural beliefs                      | 150              | 32.89            |
|                                                                                             | The perception that herbs are safer   | 25               | 5.48             |

## Annex II

### Consent Form

Consent form in English

My name is ----- I am a member of the research team conducted by Absera Melak MPH student at Debre Berhan University, Asrat Woldeyes Health Science Campus, and Department of general master of public health. I am here to gather information about prevalence herbal medicine utilization and factors affecting it so I want to ask some questions. Would you mind if I took some time in your facility? Clients name will not be included in the information. I promise to keep the confidentiality of client's data. The study will provide is very important to solve problems associated with herbal medicine utilization and associated factors among pregnant women at Gazo District, North Wollo Zone, Ethiopia, 2025.

Are you willing to allow me to conduct the study in your facility?

Yes\_\_\_\_\_ No\_\_\_\_\_

I have been briefly informed about the study and I clearly understood the objective. Consequently, I here approve my consent with my signature.

Signature\_\_\_\_\_

Date\_\_\_\_\_

If you have any question you can contact the principal investigator by this address.

Cell phone number: 0963780538 or e-mail at address: [absi.melak@gmail.com](mailto:absi.melak@gmail.com)

## Information sheet and Verbal consent

Greeting;

How are you, my name is ----- I am a member of the research team conducted by Absera Melak MPH student at Debre Berhan University, Asrat Woldeyes Health Science Campus, Department of general master of public health. I am here to gather information about prevalence of Herbal medicine utilization and factors affecting it so I want to ask some questions. Would you mind if I take some time with you? Your name will not be included in the information. I promise to keep the confidentiality of your response. It takes us about 5 minute. The study will help to improve the health of People living with HIV.

Your participation is voluntary and you are not obligate to answer any question which you do not wish to answer. If you fill discomfort with this, please fill free to drop it any time you want.

Are you willing to participate in the study?

Yes\_\_\_\_\_ No\_\_\_\_\_

Name and Signature of interviewer

Name of health institution; \_\_\_\_\_

Name of data collector; \_\_\_\_\_ Signature \_\_\_\_\_

Name of supervisor\_\_\_\_\_

Date; \_\_\_\_\_

Start time \_\_\_\_\_

Code No of Participant\_\_\_\_\_

If you have any question you can contact the principal investigator by this address.

Cell phone number: 0963780538

E-mail at address: [absi.melak@gmail.com](mailto:absi.melak@gmail.com)

### Data collection tool (English version)

The questionnaire was prepared to collect data to assess prevalence of herbal medicine utilization and associated factors among pregnant women at Gazo District, North Wollo Zone, Ethiopia, 2025.

Participant Identification Number: \_\_\_\_\_ Date: \_\_\_\_\_

#### Section A: Socio-demographic characteristics related questions.

In this section we are going to ask you questions about yourself. Please feel free to tell us the Truth. As I told you earlier, this information will be treated confidentially and no one outside the study team will have access to it.

| Code | Question                     | Response                                                                                             | Remark |
|------|------------------------------|------------------------------------------------------------------------------------------------------|--------|
| Q 01 | Age in years?                | -----                                                                                                |        |
| Q 02 | What is your marital status? | 1.Married<br>2.Single<br>3.Widowed<br>4.Divorsed                                                     |        |
| Q03  | What is your religion?       | 1.Orthodox<br>2.Muslim<br>3.Protestant<br>5.Others                                                   |        |
| Q04  | What is your occupation?     | 1.House wife<br>2.Merchant<br>3.Student<br>4.Daily laborer<br>5.Government employ<br>6.Other specify |        |
|      | What is your residence       | 1.Rural                                                                                              |        |

|                                                                                                                                                                                                                                                                                        |                                                                                         |                                                                                                                                                          |                             |
|----------------------------------------------------------------------------------------------------------------------------------------------------------------------------------------------------------------------------------------------------------------------------------------|-----------------------------------------------------------------------------------------|----------------------------------------------------------------------------------------------------------------------------------------------------------|-----------------------------|
| Q05                                                                                                                                                                                                                                                                                    |                                                                                         | 2.Urban                                                                                                                                                  |                             |
| Q06                                                                                                                                                                                                                                                                                    | What is your educational status                                                         | 1. Unable to read or write.<br>2. No formal education<br>3. Primary education (grade 1-8)<br>4. Secondary education (grade 9-12)<br>5. Diploma and above |                             |
| Q07                                                                                                                                                                                                                                                                                    | What is your husband educational status                                                 | 1. Unable to read or write.<br>2. No formal education<br>3. Primary education (grade 1-8)<br>4. Secondary education (grade 9-12)<br>5. Diploma and above | If not married skip to Q 09 |
| Q08                                                                                                                                                                                                                                                                                    | What is your husband occupation                                                         | 1.Farmer<br>2.Merchant<br>3.Government employee<br>4.Daily laborer<br>5.Other specify-----                                                               |                             |
| Q09                                                                                                                                                                                                                                                                                    | Family Size                                                                             | -----Birr                                                                                                                                                |                             |
| Q10                                                                                                                                                                                                                                                                                    | Do you have any chronic diseases or medical conditions?                                 | 1.Yes(Please Specify-----<br>2. No                                                                                                                       |                             |
| Q11                                                                                                                                                                                                                                                                                    | If yes, Have you used herbal medicine during your pregnancy to manage chronic diseases? | 1.Yes(Please Specify-----<br>2. No                                                                                                                       |                             |
| <b>Section B: Obstetrics and Gynecology Factors Questions</b><br>I am now going to ask you some questions about Obstetrics and Gynecology Factors. This information will be treated Confidentially and no one outside the study team will have access to it. Please answer truthfully. |                                                                                         |                                                                                                                                                          |                             |
| Q1                                                                                                                                                                                                                                                                                     | What is your parity in number?                                                          | -----                                                                                                                                                    |                             |



|    |                                                                         |                                                                                                                                                                                                                                         |  |
|----|-------------------------------------------------------------------------|-----------------------------------------------------------------------------------------------------------------------------------------------------------------------------------------------------------------------------------------|--|
| Q2 | How many pregnancies have you had including the current pregnancy?      | -----                                                                                                                                                                                                                                   |  |
| Q3 | How far along are you in your current pregnancy?                        | -----weeks                                                                                                                                                                                                                              |  |
| Q4 | How many times you follow ANC?                                          | -----                                                                                                                                                                                                                                   |  |
| Q5 | When do you start ANC follow up?                                        | -----weeks                                                                                                                                                                                                                              |  |
| Q6 | Have you ever used herbal medicine during your previous pregnancy       | 1.Yes<br>2.No<br>3 This is my first pregnancy                                                                                                                                                                                           |  |
| Q7 | If yes when did you took it?                                            | -----weeks                                                                                                                                                                                                                              |  |
| Q8 | For what purpose did you take it?<br>(more than one answer is possible) | 1.To relieve pregnancy-related discomfort<br>(e.g., nausea, back pain, fatigue)<br>2.To improve overall health and wellness<br>3.To avoid modern medications<br>4. Family or friends recommended it<br>5. Other (please specify): _____ |  |

### Section C: Health Service related Questions

I am now going to ask you some questions about Health Service related. This information will be treated Confidentially and no one outside the study team will have access to it. Please answer truthfully.

|    |                               |                    |  |
|----|-------------------------------|--------------------|--|
| Q1 | Distance from health facility | 1.>5 Km<br>2.<5 Km |  |
|----|-------------------------------|--------------------|--|

|    |                                                                             |                                                                                                                                                  |  |
|----|-----------------------------------------------------------------------------|--------------------------------------------------------------------------------------------------------------------------------------------------|--|
| Q2 | Do you get health education/health information during your ANC visit?       | 1. Yes<br>2. No                                                                                                                                  |  |
| Q3 | If yes, what type of health information? (more than one answer is possible) | 1. Nutrition<br>2. Personal Hygiene<br>3. Herbal medicine risks<br>4. Importance of ANC visit and Birth preparedness<br>5. Others (specify)----- |  |

#### **Section D: Socio-Cultural related Questions**

I am now going to ask you some questions about Socio-Cultural related. This information will be treated Confidentially and no one outside the study team will have access to it. Please answer truthfully.

|     |                                                                                      |                                                                                                                                                                  |  |
|-----|--------------------------------------------------------------------------------------|------------------------------------------------------------------------------------------------------------------------------------------------------------------|--|
| Q1  | Who recommended the herbal medicine to you?                                          | 1. Traditional healer<br>2. Family member<br>3. Friend/neighbor<br>4. Health professional<br>5. Self (personal experience)                                       |  |
| Q 2 | Did you pay for the herbal medicines you used?                                       | 1.Yes<br>2. No                                                                                                                                                   |  |
| Q 3 | Do you think herbal medicine is more accessible and affordable than Modern medicine  | 1. Yes<br>2. No                                                                                                                                                  |  |
| Q4  | Do you think herbal medicine is effective and safe than modern medicine              | 1.Yes<br>2. No                                                                                                                                                   |  |
| Q5  | What factors influenced your decision to use herbal medicine over modern healthcare? | 1. Lack of access to healthcare services<br>2. Cost of modern medicine<br>3. Cultural beliefs<br>4. Perception that herbs are safer<br>5. Other (Specify): _____ |  |

|                                                                                                                                                                                                                                                                          |                                                                                                         |                                                                                                                                                                                                                                      |                    |
|--------------------------------------------------------------------------------------------------------------------------------------------------------------------------------------------------------------------------------------------------------------------------|---------------------------------------------------------------------------------------------------------|--------------------------------------------------------------------------------------------------------------------------------------------------------------------------------------------------------------------------------------|--------------------|
|                                                                                                                                                                                                                                                                          |                                                                                                         |                                                                                                                                                                                                                                      |                    |
| Q6                                                                                                                                                                                                                                                                       | Have you been encouraged by cultural or religious practices to use herbal medicine during pregnancy?    | 1.Yes<br>2.No                                                                                                                                                                                                                        |                    |
| Q7                                                                                                                                                                                                                                                                       | Is herbal medicine commonly used by pregnant women in your community?                                   | 1.Yes<br>2.No                                                                                                                                                                                                                        |                    |
| <b>Section E:Herbal Medicine Utilization Questions</b><br>I am now going to ask you some questions about Herbal Medicine Utilization. This information will be treated Confidentially and no one outside the study team will have access to it. Please answer truthfully |                                                                                                         |                                                                                                                                                                                                                                      |                    |
| Q1                                                                                                                                                                                                                                                                       | Have you used herbal medicine during your current pregnancy?                                            | 1.Yes<br>2. No                                                                                                                                                                                                                       | If No skip to Q 38 |
| Q2                                                                                                                                                                                                                                                                       | If yes, Which of the following herbal medicines have you used during pregnancy? (Select all that apply) | 1. Ocimum lamiifolium (Damakase)<br>2. Rutachalepensis (Tenaadam)<br>3. Zingiber officinale (Ginger)<br>4. Eucalyptus globulus(Eucalyptus)<br>5. Other (please specify):_____                                                        |                    |
| Q3                                                                                                                                                                                                                                                                       | What are the primary reasons you use herbal medicine during pregnancy? (Select all that apply)          | 1.To relieve pregnancy-related discomfort (e.g., nausea, back pain, fatigue)<br>2.To improve overall health and wellness<br>3. To avoid modern medications<br>4. Family or friends recommended it<br>5. Other (please specify):_____ |                    |
| Q4                                                                                                                                                                                                                                                                       | For what pregnancy related symptom using herbal medicine? (Select all that are applicable.)             | 1.Vomiting / Nausea<br>2. Common cold<br>3. Headache<br>4. Diarrhea<br>5.Dyspepsia<br>6. Other (Specify)                                                                                                                             |                    |

|    |                                                                  |                                                                                                                                     |  |
|----|------------------------------------------------------------------|-------------------------------------------------------------------------------------------------------------------------------------|--|
| Q5 | What part of the (herb) do you use?                              | 1.Seed<br>2.Root<br>3.Leaf<br>4.Other (Specify-----                                                                                 |  |
| Q6 | By what method you apply herbal medicine? (Check all that apply) | 1. Oral<br>2. Inhalation<br>3. Topical<br>4. Other (Specify-----                                                                    |  |
| Q7 | In what form do you use herbal medicine During pregnancy?        | 1.Tea<br>2.Cpsules/Tablet<br>3.Powder<br>4.Oil<br>5 .Other(Specify-----)                                                            |  |
| Q8 | How often do you use herbal medicine?                            | 1.Daily<br>2.Weekly<br>3.Occasionally (less than once a week)<br>4.Only when symptoms arise                                         |  |
| Q9 | Have you experienced any obstetric complications                 | 1.Yes (Please specify): _____<br>2. No                                                                                              |  |
|    | How do you usually obtain herbal medicines?                      | 1. Pharmacy<br>2. Herbalist or traditional healer<br>3. Local market<br>4. Family or friends<br>5. Other (please specify):<br>_____ |  |

## STATA output for multivariable binary logistic regression

```

Logistic regression               Number of obs   =      456
                                LR chi2(17)        =     194.19
                                Prob > chi2         =     0.0000
Log likelihood = -212.94895       Pseudo R2      =     0.3132
  
```

| Heba1New                 | Odds Ratio | Std. Err. | z     | P> z  | [95% Conf. Interval] |          |
|--------------------------|------------|-----------|-------|-------|----------------------|----------|
| Residence                |            |           |       |       |                      |          |
| Rural                    | 2.075708   | .5642028  | 2.69  | 0.007 | 1.218427             | 3.536171 |
| Educationstu             |            |           |       |       |                      |          |
| Unable to read and write | 3.765591   | 1.637056  | 3.05  | 0.002 | 1.606131             | 8.828467 |
| No formal Education      | 5.081073   | 2.360996  | 3.50  | 0.000 | 2.04377              | 12.6322  |
| Primary Education        | 2.151152   | 1.418482  | 1.16  | 0.245 | .5907232             | 7.833546 |
| Secondary Education      | 2.010366   | 1.242907  | 1.13  | 0.259 | .5984395             | 6.753516 |
| Chronicdisaeas           |            |           |       |       |                      |          |
| Yes                      | 1.277253   | .4349152  | 0.72  | 0.472 | .6552935             | 2.489534 |
| Distancefromherb         |            |           |       |       |                      |          |
| >5 Metre                 | 6.062792   | 1.616207  | 6.76  | 0.000 | 3.595515             | 10.22314 |
| herbausebeforecurentprg  |            |           |       |       |                      |          |
| Yes                      | 4.000743   | 1.289138  | 4.45  | 0.000 | 2.197041             | 7.579496 |
| Encouragedcultural       |            |           |       |       |                      |          |
| Yes                      | 2.184929   | .6247053  | 2.73  | 0.006 | 1.247572             | 3.826565 |
| ParityNew                |            |           |       |       |                      |          |
| <=2 childeren            | 1.313221   | .346526   | 1.03  | 0.302 | .7829378             | 2.202665 |
| ANCVisitNew              |            |           |       |       |                      |          |
| <3 Times Vsit            | 3.45611    | .9849654  | 4.35  | 0.000 | 1.976976             | 6.041901 |
| GravidityNew             |            |           |       |       |                      |          |
| <2 Primigravida          | .911216    | .2716622  | -0.31 | 0.755 | .5079855             | 1.634524 |
| GestationalAgeNew        |            |           |       |       |                      |          |
| First Trimister          | .8956087   | .3558296  | -0.28 | 0.781 | .4110852             | 1.951213 |
| Secound Trimister        | 1.219425   | .5185362  | 0.47  | 0.641 | .5299054             | 2.806154 |
| StartANCvisit            |            |           |       |       |                      |          |
| StartANC with in 12weeks | 1.283362   | .459046   | 0.70  | 0.485 | .636624              | 2.587115 |
| FamilySizeNew1           |            |           |       |       |                      |          |
| 5-6                      | 1.410907   | .4245847  | 1.14  | 0.253 | .7822507             | 2.544783 |
| >7                       | 1.337443   | .4704623  | 0.83  | 0.408 | .6712041             | 2.664993 |
| _cons                    | .0209888   | .0129974  | -6.24 | 0.000 | .0062356             | .0706474 |

. vif

| Variable       | VIF  | 1/VIF    |
|----------------|------|----------|
| Residence      | 1.22 | 0.820826 |
| StartANCvisi~t | 1.22 | 0.821679 |
| Encouraged~l   | 1.21 | 0.827839 |
| GravidityNew   | 1.20 | 0.835604 |
| Distancefr~b   | 1.18 | 0.844220 |
| ANCVisitNew    | 1.16 | 0.859947 |
| FamilySize~1   | 1.16 | 0.864572 |
| Chronicdis~s   | 1.13 | 0.887679 |
| ParityNew      | 1.10 | 0.911534 |
| Educationstu   | 1.09 | 0.914024 |
| herbausebe~g   | 1.09 | 0.919018 |
| Gestationa~w   | 1.08 | 0.926804 |
| Mean VIF       | 1.15 |          |
